# Supplementary material
Source: PubMed Central journal article supplement (PMC7869854)
Supplement: NIHMS1664675-supplement-1.pdf [file NIHMS1664675-supplement-1.pdf]

**Supplementary Table 1. flow cytometric antibodies used in this study**

| <b>Antibody</b> | <b>FLUOROCHROME</b> | <b>Manufacturer</b> | <b>CLONE#</b> | <b>CATALOG #</b> |
|-----------------|---------------------|---------------------|---------------|------------------|
| CD14            | PerCP/ Cy5.5        | Biologend           | HCD14         | 325622           |
| CD16            | APC                 | Biologend           | 3G8           | 302012           |
| PDL-1           | APC                 | Biologend           | 29E.2A3       | 329708           |
| CD163           | FITC                | Biologend           | GHI/61        | 333618           |
| CD206           | PE                  | Biologend           | 15-2          | 321106           |
| HLA-DR          | PE                  | Biologend           | LN3           | 327008           |
| CD86            | ALF 488             | Biologend           | IT2.2         | 305414           |

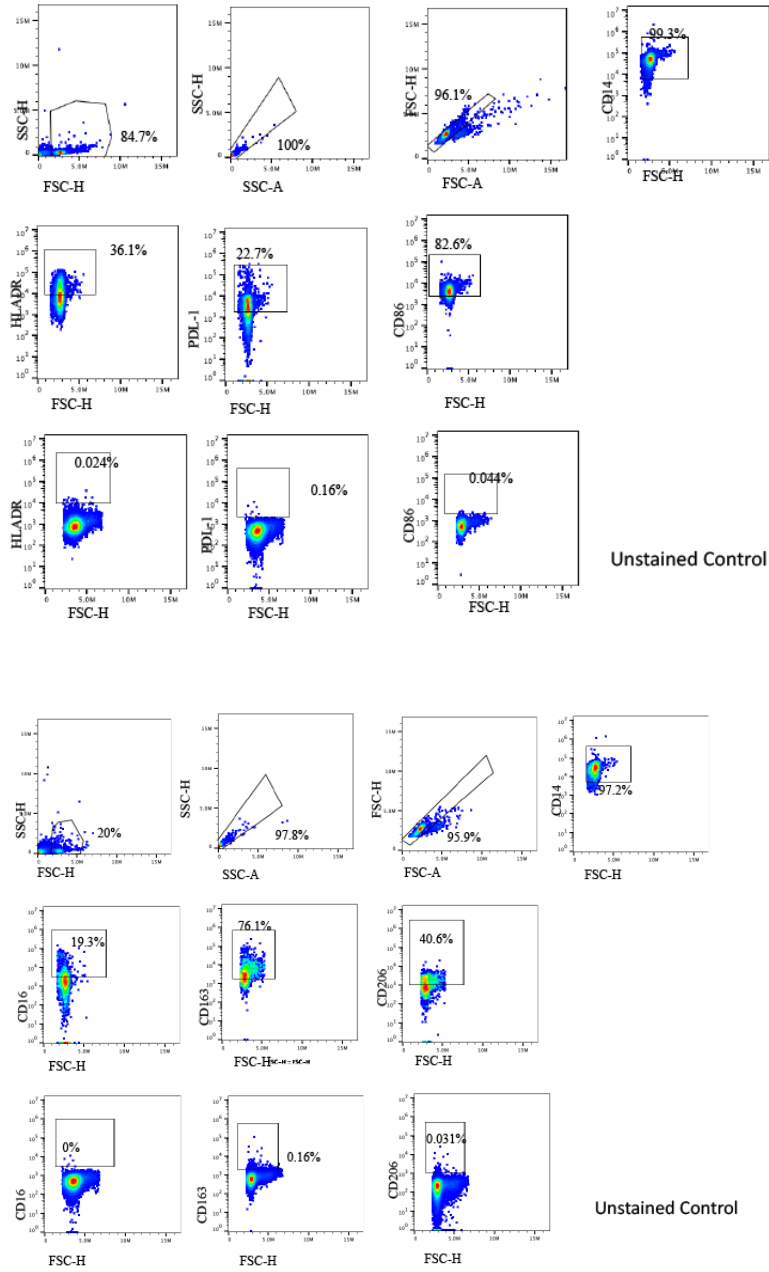

**Supplementary Fig. 1. Pseudo plot showing the gating hierarchy in baseline monocytes.**

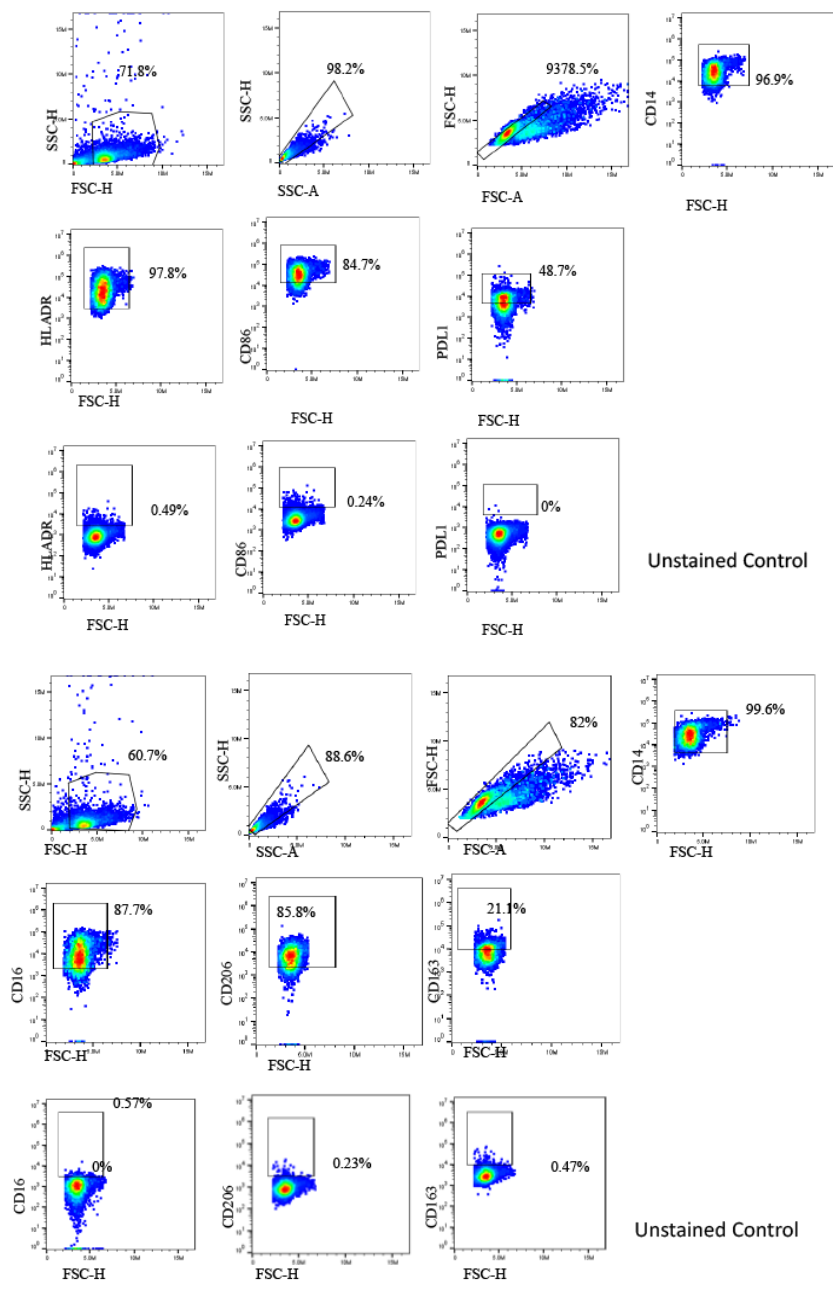

**Supplementary Fig. 2. Pseudo plot showing the gating hierarchy when monocytes are cultured on Plastic.**

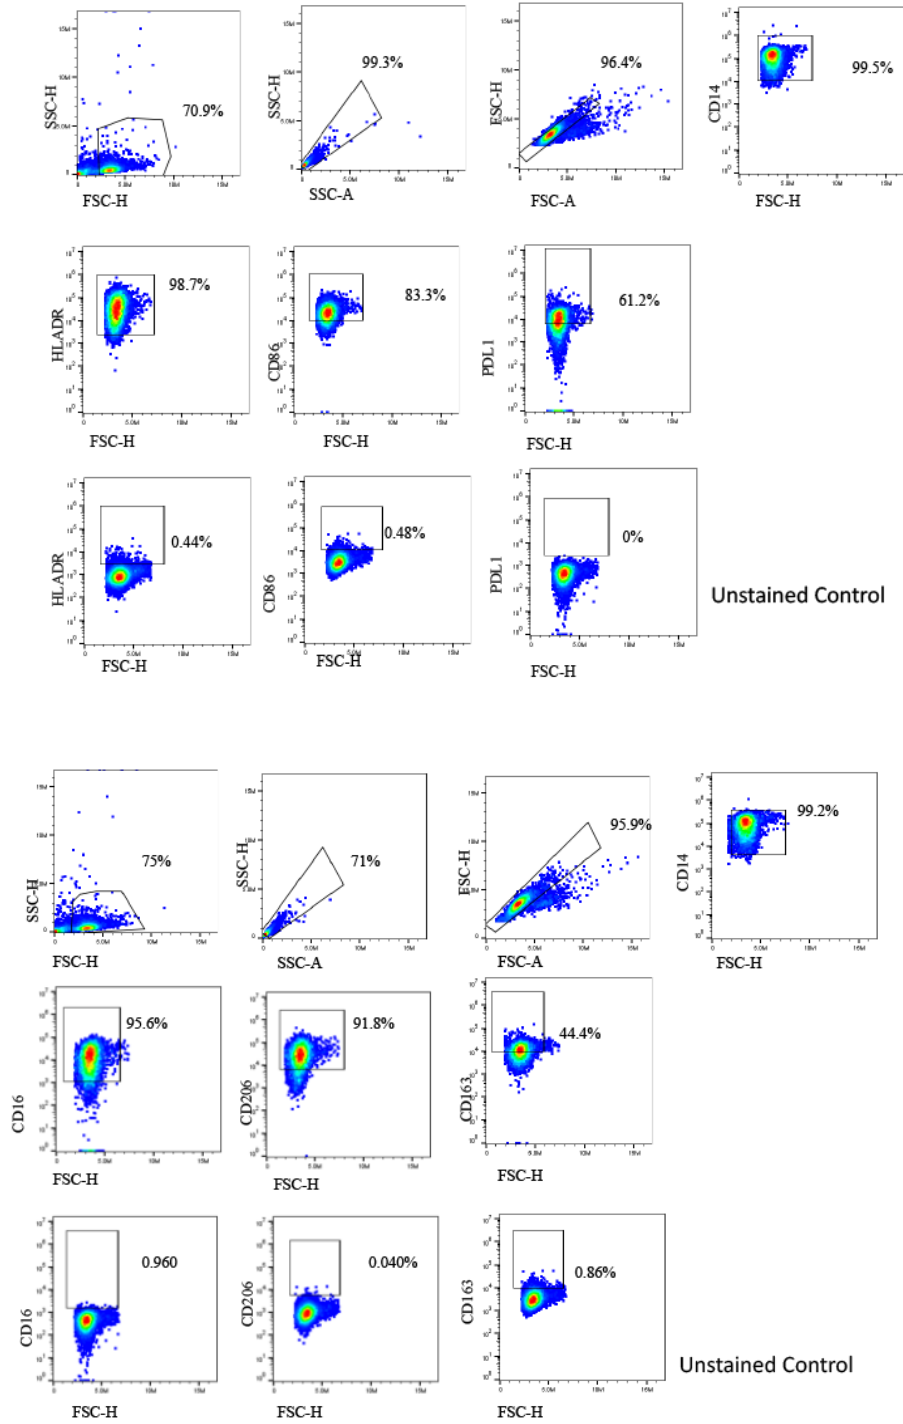

**Supplementary Fig. 3. Pseudo plot showing the gating hierarchy when monocytes are cultured on Gelatin.**

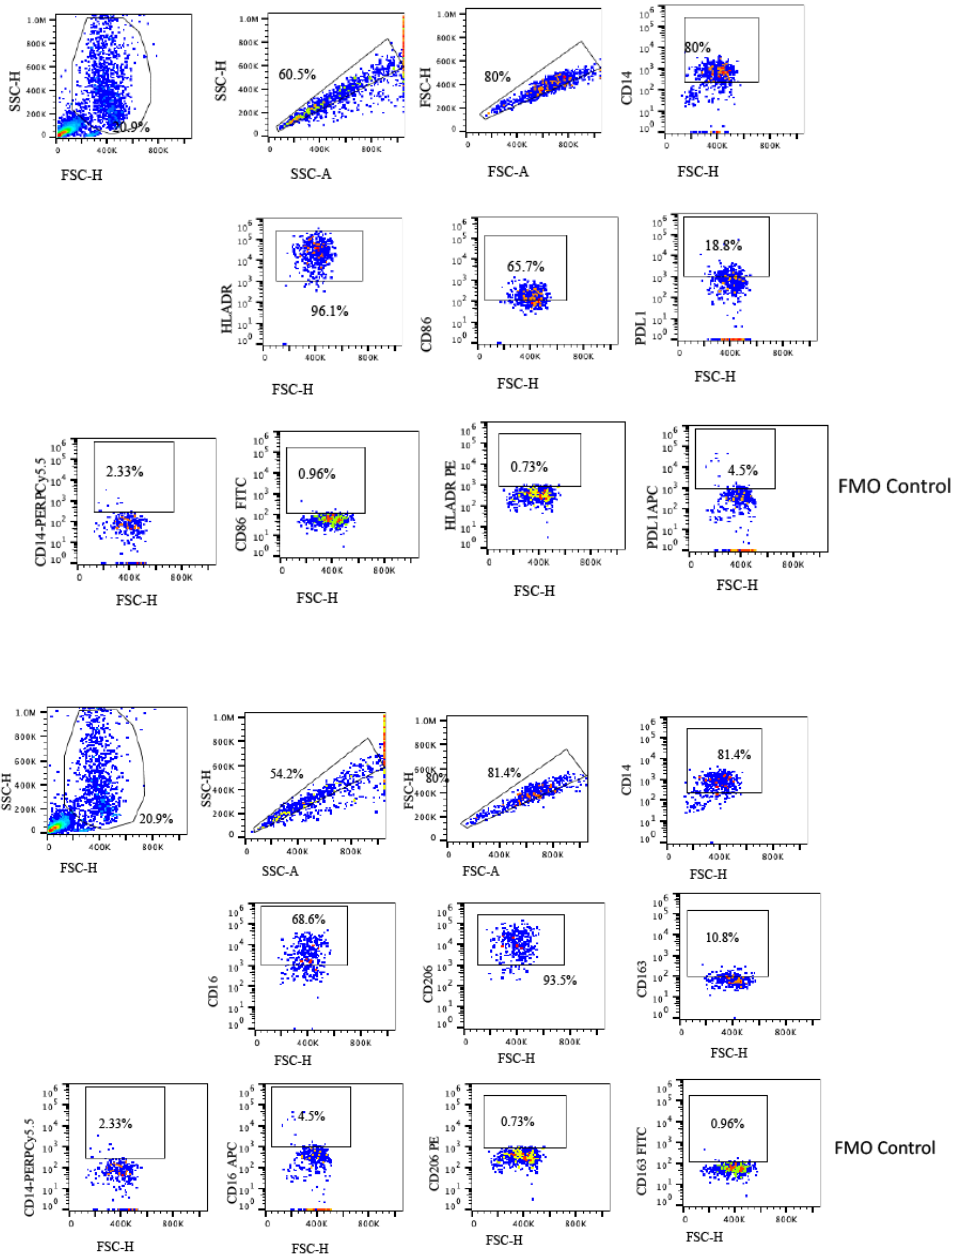

**Supplementary Fig. 4. Pseudo plot showing the gating hierarchy when monocytes are cultured on Fibronectin.**

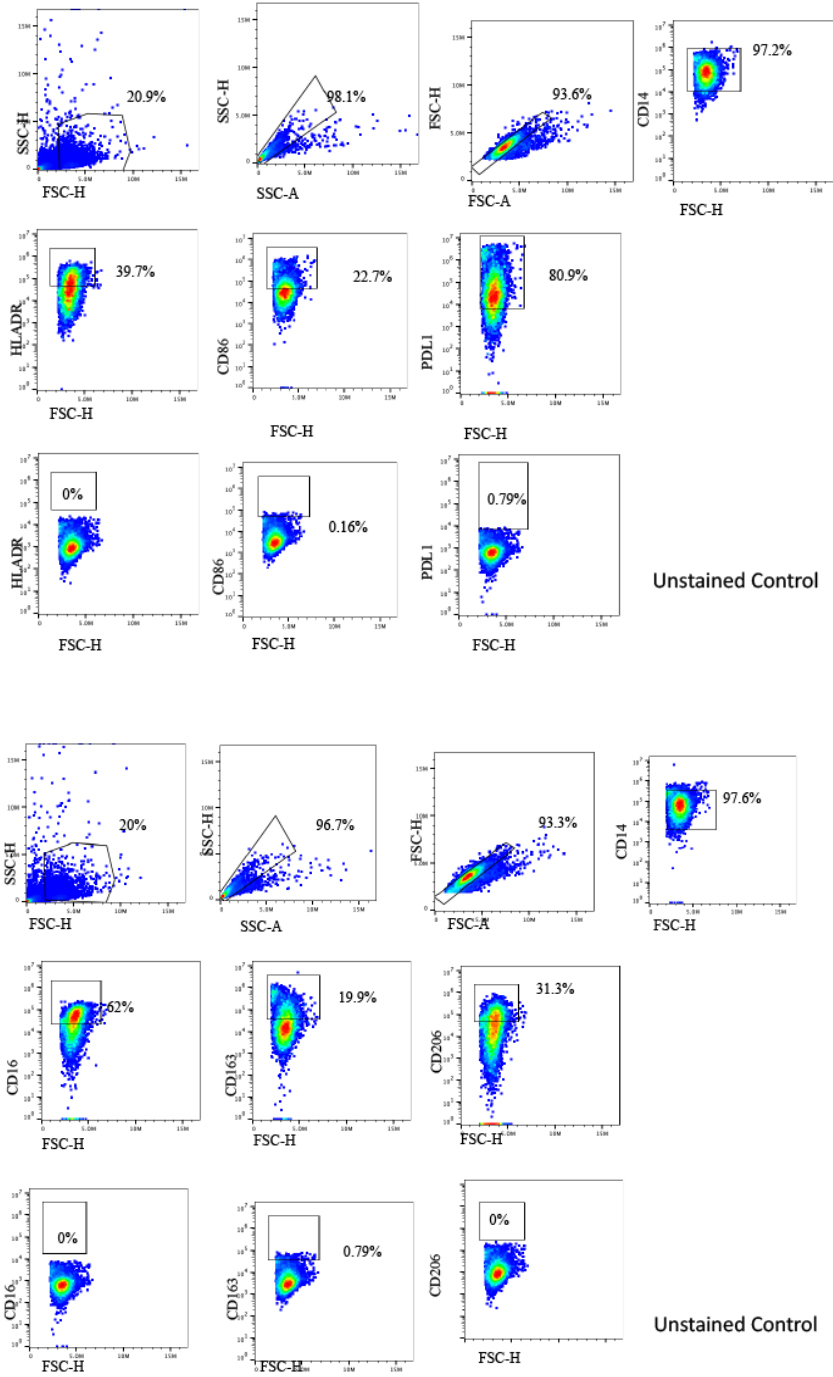

**Supplementary Fig. 5. Pseudo plot showing the gating hierarchy when monocytes are cultured on CX.**

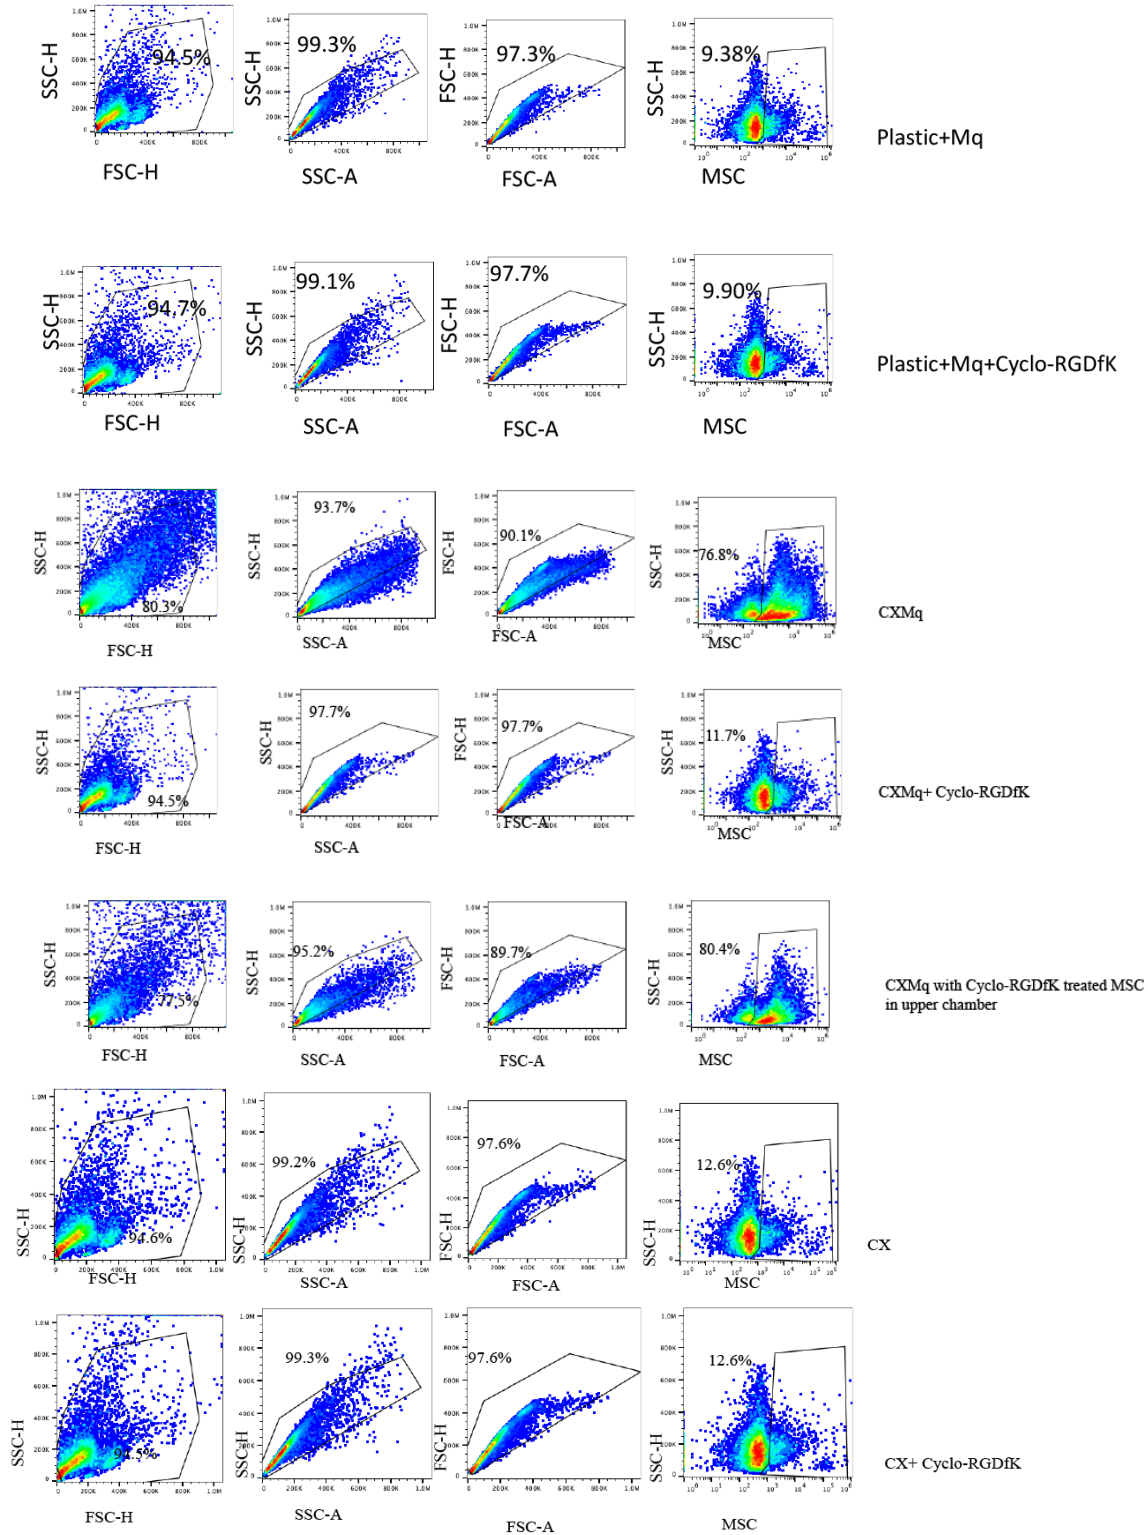

**Supplementary Fig. 6. Pseudo plots shows the gating strategy of the CXMq/ MSC treated with and without  $\alpha$ V $\beta$ 3 inhibitor.**

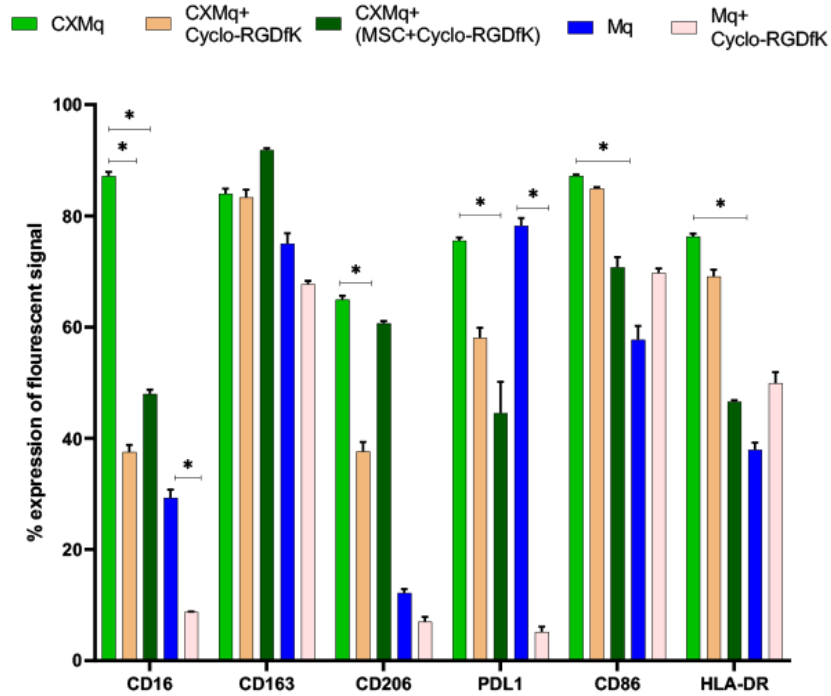

**Supplemental Fig. 7.** Bar graph showing the expression of M1 and M2 like markers after 22 hours post migration.

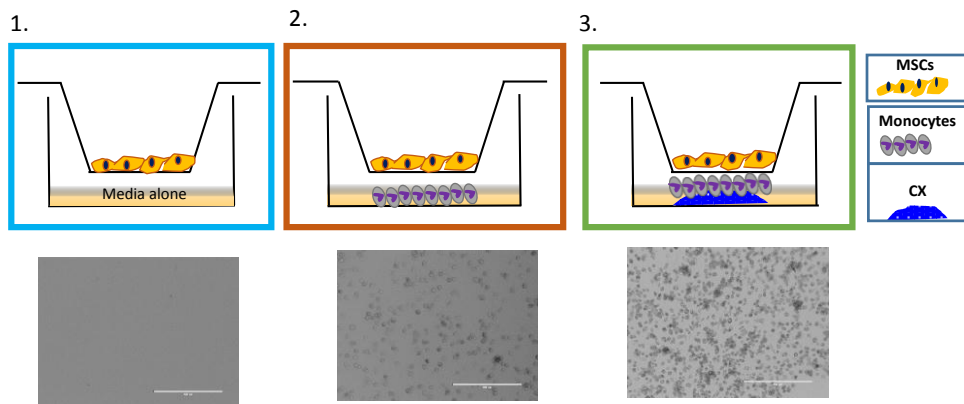

**Supplemental Fig. 8.** Schematic diagram of migration assay set up— only media in the lower chamber as negative control (1<sup>st</sup> panel), only macrophages (2<sup>nd</sup> panel), and cardiac fibroblast derived matrix-educated macrophages (3<sup>rd</sup> Panel). Phase contrast images show cells that migrated to the lower chamber after 22h. Scale bar =100  $\mu$ m.
